# Supplementary material for: Bulk properties and transport mechanisms of a solid state antiperovskite Li-ion conductor Li3OCl: insights from first principles calculations
Source: Royal Society of Chemistry journal article supplement (doi:10.1039/c7ta08780b), 2017-12-08
Supplement: c7ta08780b1.pdf [file c7ta08780b1.pdf]

# **Bulk Properties and Transport Mechanisms of Solid State Antiperovskite Li-ion Conductor Li<sub>3</sub>OCl : Insights from First Principles Calculations—Supplementary Information**

Musheng Wu<sup>a</sup>, Bo Xu<sup>a</sup>, Xueling Lei<sup>a</sup>, Kelvin Huang<sup>b</sup>, Chuying Ouyang<sup>\*a</sup>

<sup>a</sup> *Department of Physics, Laboratory of Computational Materials Physics, Jiangxi Normal University, Nanchang, China*

<sup>b</sup> *Department of Mechanical Engineering, University of South Carolina, Columbia, USA*

*\*E-mail: [cyouyang@jxnu.edu.cn](mailto:cyouyang@jxnu.edu.cn)*

## **1. Detailed calculations**

For primitive cell optimization and elastic property calculations, a 6×6×6 Monkhorst-Pack<sup>1</sup> *k*-point grid in the Brillouin Zone is sampled. The convergence criteria for the total energies and ionic forces are set to 10<sup>-5</sup> eV and 10<sup>-3</sup> eV/Å, respectively. For the density of states (DOS) calculations, a 12×12×12 *k*-mesh is used, and the Gaussian smearing method with a smearing width of 0.05 eV is used. The Heyd-Scuseria-Ernzerhof (HSE06)<sup>2</sup> hybrid functional is used to calculate the band structure of Li<sub>3</sub>OCl. In terms of band gaps calculations, hybrid Hartree-Fock/DFT approaches<sup>3</sup> are used since it has been proven more reliable than the GGA-PBE functional.

For phonon data calculations, the PHONOPY code is used for the calculation of the phonon dispersion spectrum and thermodynamic properties,<sup>4</sup> which directly uses the dynamic matrices calculated by the density functional perturbation theory (DFPT)<sup>5</sup> implemented in VASP. A 4×4×4 *k*-point grid and 10<sup>-8</sup> eV/Å electronic forces convergence are used. For defects formation energy and Li<sup>+</sup> migration energy barrier calculations, a 3×3×3 supercell of the primitive cubic-unit cell (containing 135 atoms) is used with a 2×2×2 *k*-point grid and 5×10<sup>-2</sup> eV/Å ionic forces convergence. The Li<sup>+</sup> migration energy barriers are obtained using

the climbing image nudged elastic band (CI-NEB) method,<sup>6</sup> which optimizes the migration pathway and determines the saddle points along Li<sup>+</sup> migration pathway.<sup>7</sup>

## 2. Mechanical properties

The bulk modulus and shear modulus can be obtained by the following expression <sup>8</sup>

$$B_V = B_R = \frac{C_{11} + 2C_{12}}{3}, \quad (1)$$

$$G_V = \frac{C_{11} - C_{12} + 3C_{44}}{5}, \text{ and } G_R = \frac{5(C_{11} - C_{12})C_{44}}{4C_{44} + 3(C_{11} - C_{12})}.$$

(2)

where  $B_V$ ,  $B_R$  and  $G_V$ ,  $G_R$ , are bulk moduli and shear moduli obtained from the Voigt ( $V$ )<sup>9</sup> or Reuss ( $R$ )<sup>10</sup> schemes, respectively;  $C_{11}$ ,  $C_{12}$ , and  $C_{44}$  are the independent elastic constants.

However, the upper and lower limits of the polycrystalline bulk and shear modulus can be obtained by Voigt and Reuss schemes, respectively. Therefore, in the present work, to obtain accurately elastic moduli, the Voigt-Reuss-Hill approximations<sup>11</sup> are applied to estimate the average bulk ( $B$ ) and shear ( $G$ ) modulus in the following expressions

$$B = \frac{B_V + B_R}{2}, \quad (3)$$

$$G = \frac{G_V + G_R}{2}, \quad (4)$$

where  $B$  represents the resistance to volume change by an applied pressure;  $G$  is the opposition to reversible shear deformations. Generally speaking,  $G$  can better predict the hardness of a material than  $B$ . Furthermore, the value of  $B/G$  (known as the Pugh's ratio) is generally used to evaluate the ductility/brittleness nature of materials based on the Pugh's criterion.<sup>12</sup> When the  $B/G$  ratio is larger than 1.75, the material is regarded as ductile; otherwise it is brittle.

From the obtained  $B$  and  $G$ , other elastic parameters, *i. e.* Young's modulus ( $E$ ) and Poisson's ratio ( $\nu$ ), can be calculated by the following expression<sup>8</sup>

$$E = \frac{9BG}{3B + G}, \quad (5)$$

$$\nu = \frac{3B - 2G}{2(3B + G)}. \quad (6)$$

In addition, a dimensionless quantity  $A_G$  representing the degree of elastic anisotropy in shear for the cubic crystal is also calculated by<sup>13</sup>

$$A_G = \frac{G_V - G_R}{G_V + G_R}, \quad (7)$$

$A_G$  is zero for the elastically isotropic crystals. The larger the value  $A_G$ , the higher the elastic anisotropy of crystals.

### 3. Thermodynamic properties

#### 3.1 Thermal expansion coefficient

To obtain the volume thermal expansion coefficient ( $\alpha_V$ ) of cubic  $\text{Li}_3\text{OCl}$ , we calculated the vibrational contribution to the Helmholtz free energy of the system. The Helmholtz free energy  $F(V, T)$  of the crystal as a function of temperature and volume can be approximately is expressed by

$$F(V, T) = F_{el}(V, T) + F_{vib}(V, T)$$

$$F_{el(vib)} = U_{el(vib)} - TS_{el(vib)} \quad (8)$$

where  $F_{el}$  and  $F_{vib}$  denote the electrons and phonons contributions to the free energy, respectively. Generally, the entropy ( $S_{el}$ ) contribution from electrons is negligible, and  $U_{el}$  contribution can be calculated from DFT. From QHA,  $F_{vib}$  can be written by:

$$F_{vib} = \frac{1}{2} \sum_{q,v} \hbar \omega_{q,v}(V) + K_B T \sum_{q,v} \ln[1 - \exp(\frac{-\hbar \omega_{q,v}(V)}{K_B T})] \quad (9)$$

where  $\mathbf{q}$  and  $\nu$  are the wave vector and band index, respectively;  $\omega_{\mathbf{q},\nu}$  is the phonon frequency with a wave vector  $\mathbf{q}$  and band  $\nu$ ;  $\hbar$ ,  $K_B$ , and  $T$  denote Planck's constant, Boltzmann constant and temperature, respectively. The vibrational entropy ( $S_{vib}$ ) can be calculated by

$$S_{vib} = - \left( \frac{\partial F_{vib}}{\partial T} \right)_V = \frac{1}{2T} \sum_{\mathbf{q},\nu} \hbar \omega_{\mathbf{q},\nu} \coth \left( \frac{\hbar \omega_{\mathbf{q},\nu}}{2K_B T} \right) - K_B \sum_{\mathbf{q},\nu} \ln \left[ 2 \sinh \left( \frac{\hbar \omega_{\mathbf{q},\nu}}{2K_B T} \right) \right] \quad (10)$$

The vibrational free energy and entropy of  $\text{Li}_3\text{OCl}$  have also been calculated using Eqs. (9) and (10) and plotted in Figure S1. The vibrational free energy at 0 K is the zero point energy of the system. The vibrational free energy decreases as temperature increases, whereas the entropy increases with temperature.

Figure S2 shows the calculated Helmholtz free energy of  $\text{Li}_3\text{OCl}$  using QHA (Eq. (8)). The black solid lines are the fitted curves at a given temperature ranging from 200 to 900 K, and different symbols in each curve correspond to the minimum energy and equilibrium volume. The red dash line that connects each equilibrium volumes is only for guiding eyes. It can be seen that the equilibrium volume and free energy of the system increases and decreases with temperature, respectively.

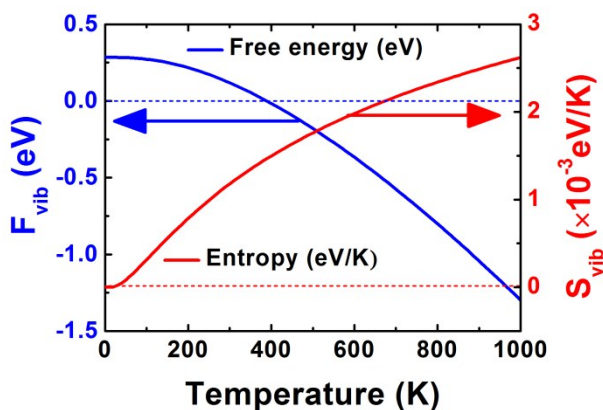

**Fig. S1** Vibrational free energy and entropy of  $\text{Li}_3\text{OCl}$  as a function of temperature.

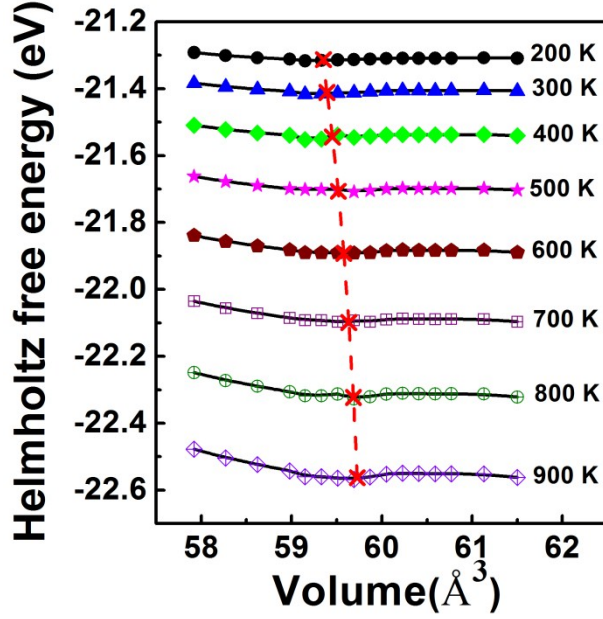

**Fig. S2** Helmholtz free energy of  $\text{Li}_3\text{OCl}$  as a function of primitive cell volume at different temperatures.

Next, the volume thermal expansion coefficient ( $\alpha_V$ ) of  $\text{Li}_3\text{OCl}$  is calculated by

$$\alpha = \frac{1}{V(T)} \frac{dV(T)}{dT}, \quad (11)$$

where  $V$  is the volume of a cell.

### 3.2 Thermal conductivity

Generally, the thermal conductivity ( $\kappa_L$ ) of a solid material has contributions from both electrons and phonons. As discussed above,  $\text{Li}_3\text{OCl}$  is a wide band gap insulator and heat transport through electrons can be negligibly small. Therefore, we only considered phonon contribution to thermal conductivity ( $\kappa_L$ ) for  $\text{Li}_3\text{OCl}$  using the following Slack<sup>14</sup> expression

$$\kappa_L = A \frac{M \theta_D^3 \delta}{\gamma^2 n^{2/3} T}, \quad (12)$$

here  $n$  is the number of atoms in the primitive unit cell;  $\delta$  is the cube root of average atomic volume;  $\theta_D$  is the Debye temperature;  $\bar{M}$  is the average mass of the atoms in the crystal;  $A$  is a collection of physical constants ( $3.1 \times 10^{-6}$  if  $\kappa$  is in W/mK);  $\bar{M}$  in atomic mass unit;  $\delta$  in angstroms;  $\gamma$  is the Grüneisen parameter, which is a direct measure of the anharmonicity of

the bonds, and can be expressed as<sup>15</sup>

$$\gamma = \frac{3\alpha_V BV}{C_V}, \quad (13)$$

where  $\alpha_V$  is the volume thermal expansion coefficient;  $B$  is the isothermal bulk modulus;  $V$  is the molar volume and  $C_V$  is the heat capacity at constant volume. To calculate the thermal conductivity,  $C_V$  and  $\theta_D$  must be obtained first. The  $C_V$  can be calculated as a function of temperature using the following relations

$$\begin{aligned} C_V &= -T \left( \frac{\partial^2 F_{vib}}{\partial T^2} \right)_V \\ &= \sum_{j,k} K_B \left( \frac{\hbar\omega_{j,k}}{K_B T} \right)^2 \frac{\exp\left(-\frac{\hbar\omega_{j,k}}{K_B T}\right)}{\left[ \exp\left(\frac{\hbar\omega_{j,k}}{K_B T}\right) - 1 \right]^2} \end{aligned} \quad (14)$$

Figure S3 shows the heat capacity  $C_V$  as a function of temperature. It can be seen that at lower temperatures,  $C_V$  increases rapidly with temperatures, in proportional with  $T^3$  and follows the typical Debye model, as shown in the insert of Figure S3. As temperature increases to 400 K, the heat capacity  $C_V$  reaches  $1.17 \times 10^{-3}$  eV/K, very close the Dulong-Petit limit of solid materials ( $1.29 \times 10^{-3}$  eV/K). In addition, due to the anharmonic approximations of the Debye model used here, we can determine the Debye temperatures ( $\theta_D$ ) by fitting the  $C_V$  curve at the low temperature range (see insert of Figure S3) with the Debye model of the following

$$C_V = \left( \frac{12}{5\theta_D^3} \pi^4 k_B n N_A \right) T^3, \quad (15)$$

where  $N_A$  is the Avogadro constant, and  $n$  is the number of atoms in the primitive unit cell. From Eq. (15), we estimated the Debye temperature ( $\theta_D$ ) to be  $\sim 412.6$  K through fitting with cubic polynomial  $C_V$  curve at a temperature range of 0 to 30 K.

Finally, through the obtained data from Eq. (13) to (15), the thermal conductivity ( $\kappa_L$ ) of  $\text{Li}_3\text{OCl}$  can be calculated by using Eq. (12).

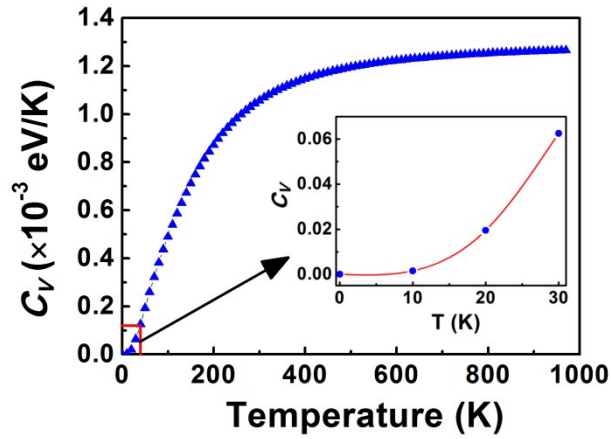

**Fig. S3** Temperature-dependent specific heat at constant volume of  $\text{Li}_3\text{OCl}$ , The inset shows the typical  $T^3$  Debye model behavior at low temperature ranging from 0 to 30 K.

#### 4. Defect chemistry

**Table S1** Energy difference of different defect configurations

| Defect types                                                                        | Defect sites | Defect pair distance ( $\text{\AA}$ ) | Energy difference (eV) |
|-------------------------------------------------------------------------------------|--------------|---------------------------------------|------------------------|
| Frenkel defect<br>( $V_{\text{Li}}' \text{Li}_i^\bullet$ )                          | $V_1$        | 2.763                                 | 0                      |
|                                                                                     | $V_2$        | 3.908                                 | 0.032                  |
|                                                                                     | $V_3$        | 4.786                                 | 0.071                  |
|                                                                                     | $V_4$        | 5.526                                 | 0.038                  |
|                                                                                     | $V_5$        | 6.179                                 | 0.003                  |
|                                                                                     | $V_6$        | 6.768                                 | 0.069                  |
|                                                                                     | $V_7$        | 7.311                                 | 0.100                  |
| LiCl defect<br>( $V_{\text{Li}}' V_{\text{Cl}}^\bullet$ )                           | $N_1$        | 2.763                                 | 0.108                  |
|                                                                                     | $N_2$        | 4.786                                 | 0                      |
|                                                                                     | $N_3$        | 6.179                                 | 0.157                  |
|                                                                                     | $N_4$        | 7.311                                 | 0.188                  |
| $\text{Li}_2\text{O}$ defect<br>( $2V_{\text{Li}}' V_{\text{O}}^{\bullet\bullet}$ ) | $A_j$        | 1.954/1.954                           | 0                      |
|                                                                                     | $O_p$        | 1.954/1.954                           | 0.007                  |
|                                                                                     | $S_1$        | 4.369/1.954                           | 0.705                  |
|                                                                                     | $S_2$        | 5.862/1.954                           | 0.698                  |

|                            |                |       |       |
|----------------------------|----------------|-------|-------|
| $O_{Cl}$ defect            | T              | 1.819 | 0.118 |
| $(O_{Cl}' - Li_i^\bullet)$ | D <sub>1</sub> | 1.819 | 0     |
|                            | D <sub>2</sub> | 1.777 | 0.012 |
|                            | S              | 4.066 | 0.452 |

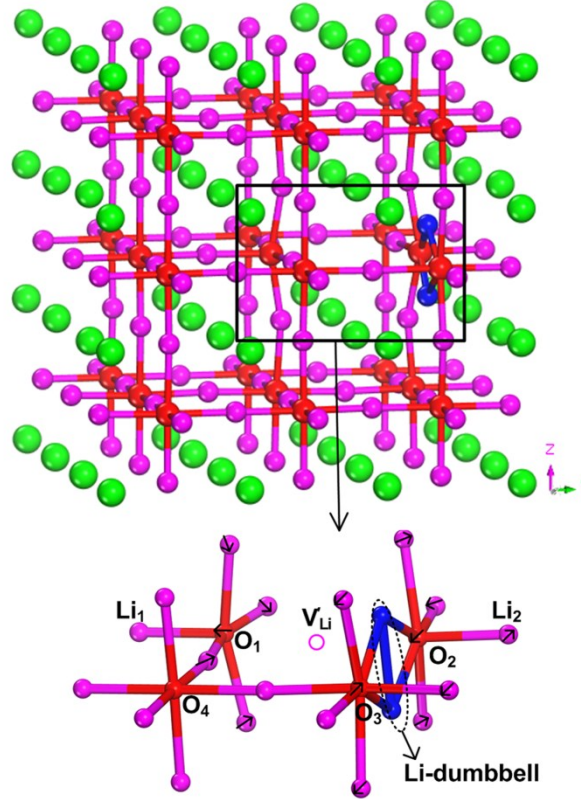

**Fig. S4** The most-stable structure of the Frenkel defect in the  $3 \times 3 \times 3$  supercell and the local structure around the Li vacancy and interstitial Li-Li dumbbell.

Figure S4 shows the lowest energy configuration ( $V_1$ ) in the Frenkel defect case (d). For the surrounding  $V_{Li}'$ , these are dominated by the motion of the nearest-neighbor O anion (labeled as  $O_1$  and  $O_2$  in Figure S4). The bond length of  $O_1$ - $O_2$  is increase by  $\sim 0.316 \text{ \AA}$ , in contrast to the defect-free system (O-O bonding  $\sim 3.908 \text{ \AA}$ ) due to Coulombic repulsion. This directly results in a shortening of the  $O_1$ - $Li_1$  and  $O_2$ - $Li_2$  bonds by  $\sim 0.127 \text{ \AA}$  and  $\sim 0.077 \text{ \AA}$ , respectively. Moreover, the nearest-neighbor  $Li^+$  moves toward  $V_{Li}'$  due to the Coulombic attraction, and the remaining four O-Li bonds are shortened by an average of  $\sim 0.053 \text{ \AA}$ ,



compared to the defect-free system (O-Li bond 1.954 Å) in the  $[O_1Li_5]$  square pyramids. For interstitial Li-Li dumbbells surroundings, the additional Li atom shares a vertex with another Li in a  $Li_6O$  octahedron, which thus has to move away from the vertex of the octahedron and forms a  $Li_7O$  polyhedron. Moreover, the two Li atoms form a Li-Li dumbbell that is centered on the original Li site and oriented parallel to the edges of the  $Li_6O$  octahedron. Compared to the perfect crystal, the nearest-neighbor O atoms ( $O_2$  and  $O_3$  in Figure S4) move toward the Li dumbbell by  $\sim 0.474$  Å due to Coulombic attraction. Conversely, the near-neighbor Li atoms shifted away from the Li dumbbell, which results in the Li-O bond. However,  $Li_2-O_2$  distance is increased by an average of 0.104 Å in the polyhedron made of  $O_2$ ,  $O_3$ , and Li atoms. The Cl atoms and other Li-O bond (such as  $O_4-Li$  in Figure S4) that are far away from the defect in the supercell do not change. It indicates that the defect ( $V_{Li}^{\cdot}$  or  $Li_i^{\cdot}$ ) only gives rise to a local atomic and geometric structure change, which is consistent with the ionic nature of the material. The results is in good agreement with those by Stegmaier *et al.*<sup>16</sup>

## 5. Discussions on $Li^+$ migration mechanisms

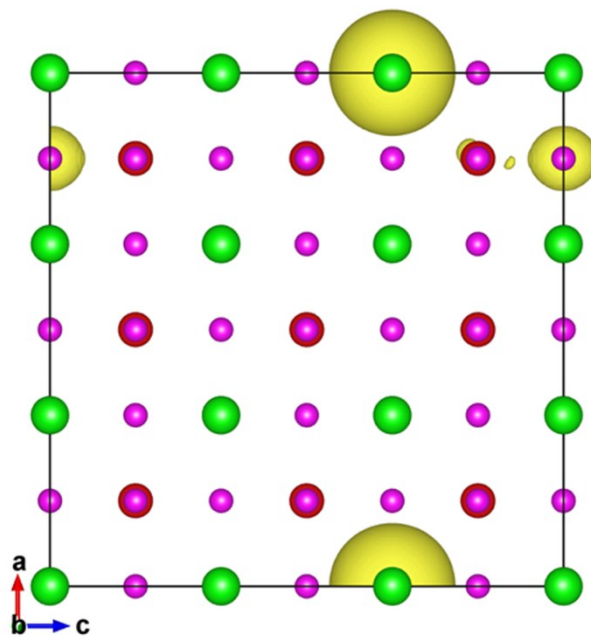

**Fig. S5** Differential charge density of LiCl defect pair case in  $3 \times 3 \times 3$   $\text{Li}_3\text{OCl}$  supercell. The yellow contour represents the charge distribution, and the value of isosurface is set to be  $0.1 \text{ e}/\text{\AA}^3$ .

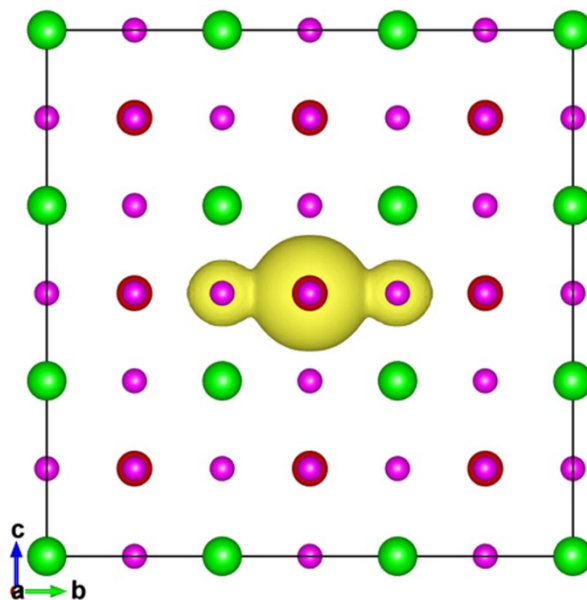

**Fig. S6** Differential charge density of  $\text{Li}_2\text{O}$  defect pair case in  $3 \times 3 \times 3$   $\text{Li}_3\text{OCl}$  supercell. The yellow contour represents the charge distribution, and the value of isosurface is set to be  $0.1 \text{ e}/\text{\AA}^3$ .

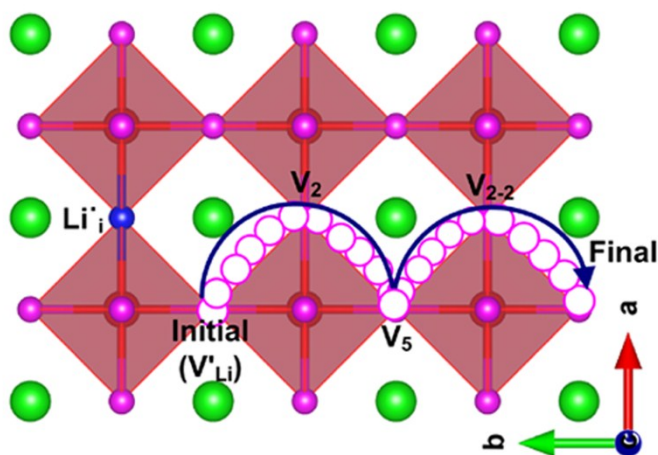

**Fig. S7** Schematic drawing of the migration pathway of  $\text{V}'_{\text{Li}}$  in the Frenkel defect case

In the diffusion pathway, a  $V_{Li}^{\prime}$  moves to the periodic image after a four-step migration:  
initial state ( $V_1$ ) $\rightarrow V_2 \rightarrow V_5 \rightarrow V_{2-2} \rightarrow$ final state ( $V_1$ ).

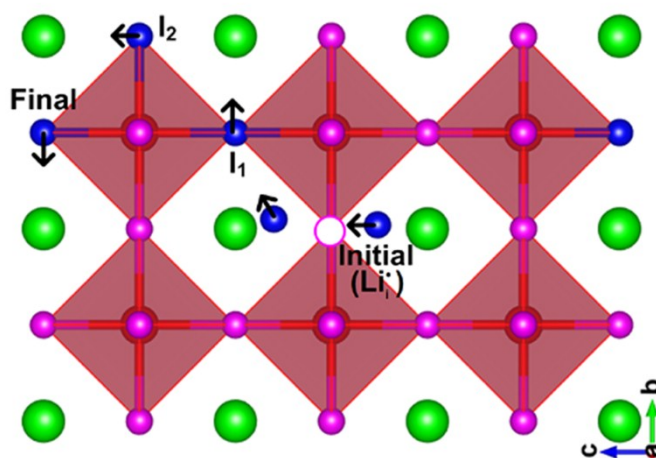

**Fig. S8** Schematic drawing of the migration pathway of  $Li_i^{\bullet}$  in the Frenkel defect case

## Notes and References

- 1 H. J. Monkhorst and J. D. Pack, *Phys. Rev. B*, 1976, **13**, 5188-5192.
- 2 A. V. Krukau, O. A. Vydrov, A. F. Izmaylov and G. E. Scuseria, *J.Chem. Phys.*, 2006, **125**, 224106.
- 3 Y. S. Kim, K. Hummer and G. Kresse, *Phys. Rev. B*, 2009, **80**, 035203.
- 4 A. Togo and I. Tanaka, *Scr. Mater.*, 2015, **108**, 1-5.
- 5 X. Gonze and C. Lee, *Phys. Rev. B: Condens. Matter Mater. Phys.*, 1997, **55**, 10355.
- 6 G. Henkelman, B. P. Uberuaga and H. A. Jónsson, *J. Chem. Phys.*, 2000, **113**, 9901.
- 7 J. T. Wang, C. F. Chen and Y. Kawazoe, *Phys. Rev. Lett.*, 2011, **106**, 075501.
- 8 Z. J. Wu, E. J. Zhao, H. P. Xiang, X. F. Hao, X. J. Liu and J. Meng, *Phys. Rev. B*, 2007, **76**, 054115.
- 9 W. Voigt, *New York: Macmillan*, 1928, pp, 313-315.
- 10 A. Reuss and Z. Angew, *Math. Mech.*, 1929, **9**, 49-58.
- 11 R. Hill, *Proc. Phys. Soc., London, sect. A*, 1952, **65**, 349-354.
- 12 S. F. Pugh, *Philos. Mag. Ser.*, 1954, **45**, 823-843.
- 13 D. H. Chung and W. R. Buessem, *J. Appl. Phys.*, 1967, **38**, 2010-2012.
- 14 G. A. Slack, *Solid State Phys.*, 1979, **34**, 1-71.

- 15 D. T. Morelli, V. Jovovic and J. P. Heremans, *Phys. Rev. Lett.*, 2008, **101**, 035901.
- 16 S. Stegmaier, J. Voss, K. Reuter and A. C. Luntz, *Chem. Mater.*, 2017, **29**, 4330-4340.
